# Supplementary material for: Binder polymer influence on the electrical and UV response of organic field-effect transistors
Source: Royal Society of Chemistry journal article supplement (doi:10.1039/d2tc05066h), 2023-01-01
Supplement: d2tc05066h1.pdf [file d2tc05066h1.pdf]

## SUPPORTING INFORMATION

**Binder polymer influence on the electrical and UV response in organic field-effect transistors**

**Jinghai Li,<sup>a, †</sup> Adrián Tamayo,<sup>a, †</sup> Aleix Quintana,<sup>a</sup> Sergi Riera-Galindo,<sup>a</sup> Raphael Pfattner,<sup>a</sup> Yanyan Gong,<sup>a,b</sup> and Marta Mas-Torrent<sup>a,\*</sup>**

<sup>a</sup> Institut de Ciència de Materials de Barcelona, ICMAB-CSIC, Campus UAB, 08193 Bellaterra.

<sup>b</sup> State Key Laboratory of Biobased Material and Green Papermaking, Qilu University of Technology (Shandong Academy of Sciences), Jinan, 250353, P. R. China

Corresponding Author: E-mail: [mmas@icmab.es](mailto:mmas@icmab.es)

<sup>†</sup>Equally contributed

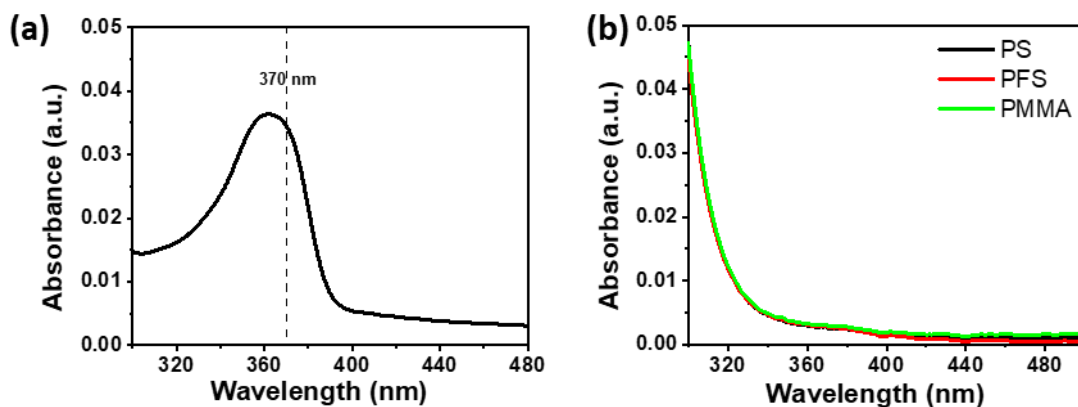

**Figure S1.** UV-Vis spectra of (a) thin film of Ph-BTBT-10 and b) PMMA, PS and FPS thin films. The dashed lines are the wavelength of UV LED employed in this work for the phototransistor measurements.

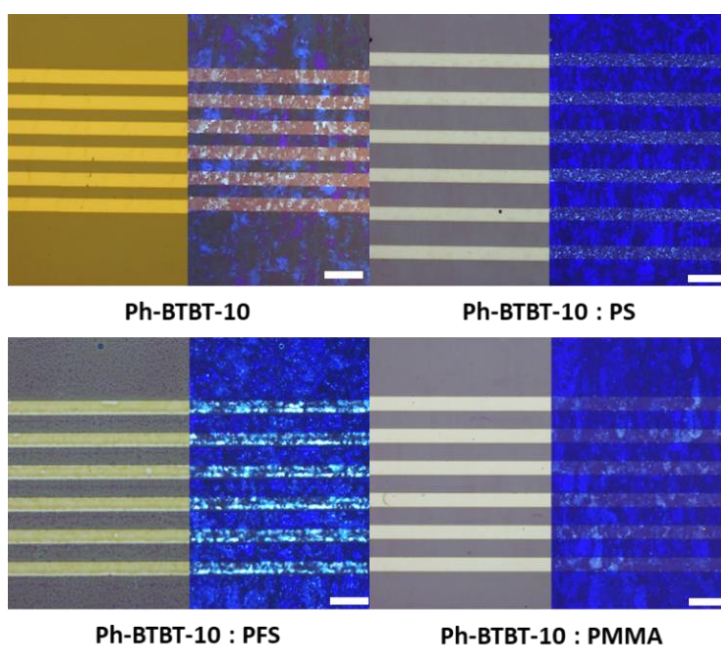

**Figure S2.** Non-polarised (left) and polarised (right) optical microscopy images of the films based on Ph-BTBT-10 and Ph-BTBT-10 blended with PS, PFS and PMMA deposited by BAMS on a SiO<sub>2</sub>/Si substrate with interdigitated electrodes. Scale bar: 100  $\mu\text{m}$ .

**Table S1.** Thickness and roughness of the films prepared extracted by AFM and relative permittivity of the binding polymers.

|                 | Thickness (nm) | Roughness (nm) | $\epsilon_r$ |
|-----------------|----------------|----------------|--------------|
| <b>Pristine</b> | 21.7±3.7       | 3.1±1.9        |              |
| <b>PS</b>       | 22.8±5.4       | 4.9±1.6        | 2.2          |
| <b>PFS</b>      | 19.3±7.2       | 6.0±0.7        | 2.8          |
| <b>PMMA</b>     | 22.2±4.5       | 2.3±1.6        | 3.5          |

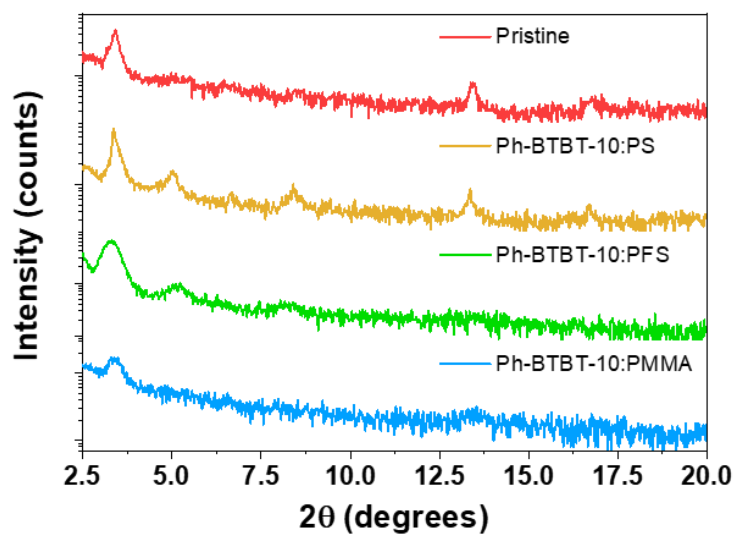

**Figure S3.** XRD diffractograms of thin films based on Ph-BTBT-10 and Ph-BTBT-10 blended with PS, PFS and PMMA.

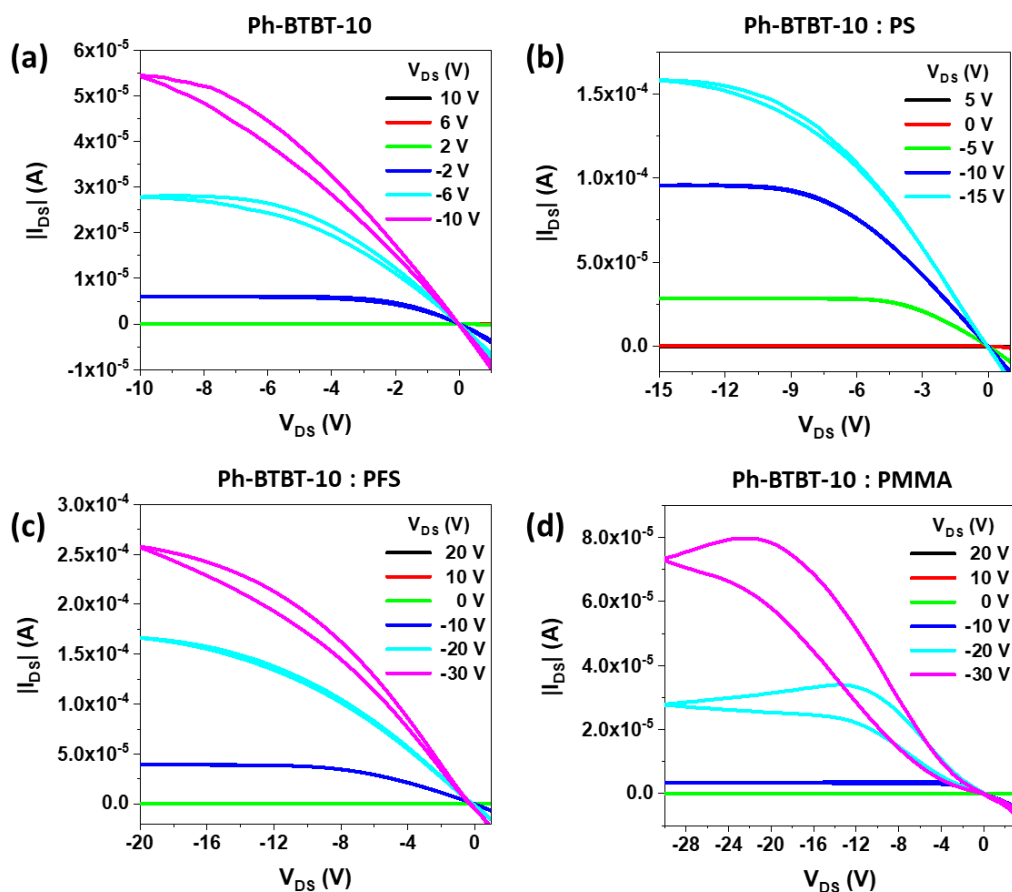

**Figure S4.** Output characteristics of the OFETs based on Ph-BTBT-10 (a), and Ph-BTBT-10 blended with PS (b), PFS (c) and PMMA (d).

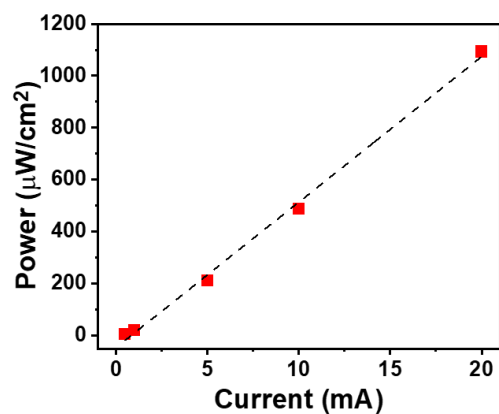

**Figure S5.** Power emitted versus current of UV LED.

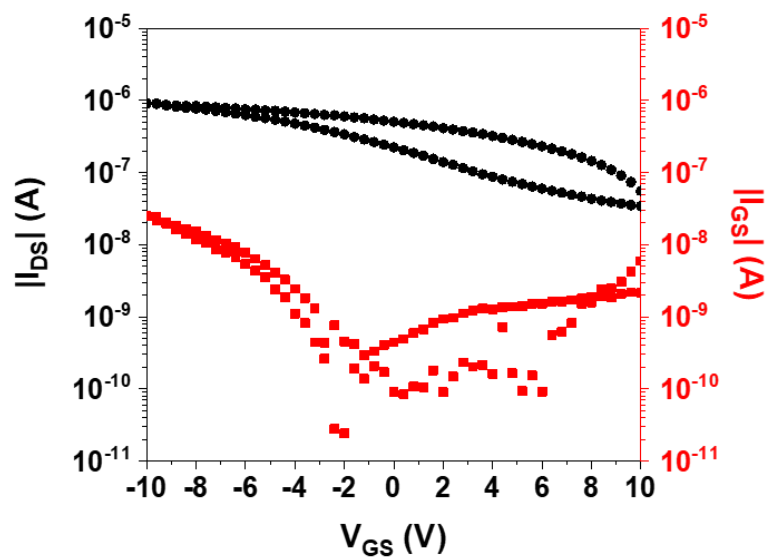

**Figure S6.** Transfer curves of an OFET based on Ph-BTBT-10:PFS under UV illumination. The black and red line corresponds to the drain and gate current, respectively.
